# Supplementary material for: The moveable “hot spots” effect in an Au nanoparticles–Au plate coupled system
Source: Royal Society of Chemistry journal article supplement (doi:10.1039/d0nr06997c), 2020-01-01
Supplement: d0nr06997c1.pdf [file d0nr06997c1.pdf]

## Supplementary information for “The moveable “hot spots” effect in Au nanoparticles-Au plate coupled system”

Ying Sun, Chenjie Zhang, Yaxian Yuan\*, Minmin Xu, Jianlin Yao\*

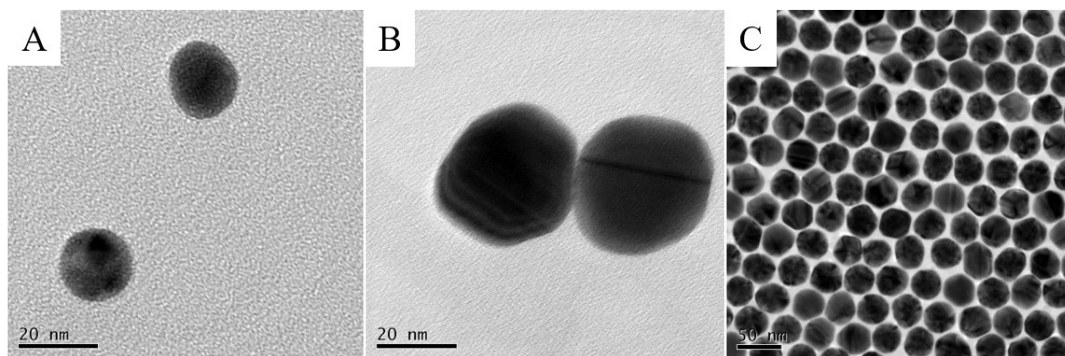

Figure S1 TEM images of Au nanoparticles with the mean diameter of 15 nm (A) and 30 nm (B). TEM image of Au MLF (C).

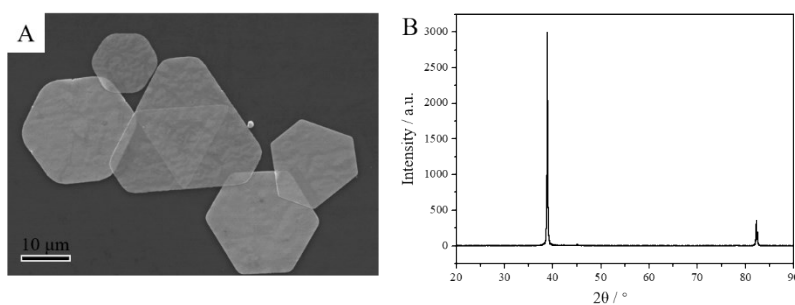

Figure S2 SEM image of Au plates (A). The corresponding XRD characterization (B).

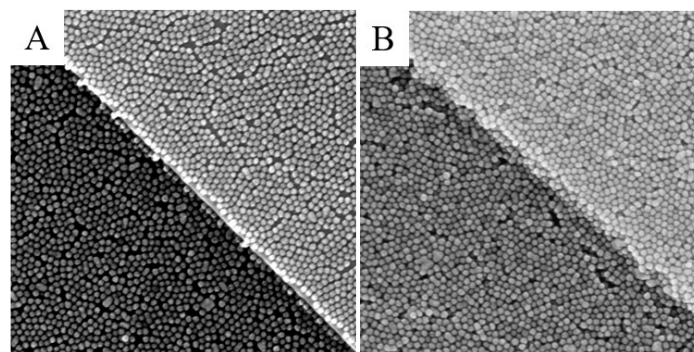

Figure S3 Local enlarged SEM images of Au plate-Au nanoparticles monolayer film coupled system (A) and Au plate-Au nanoparticles bilayer films coupled system (B).

Table S1 summary of several configurations

| Relative intensity<br>Configuration | $I_{\text{PNTP}}/I_{\text{MBA}}$ |      | $I_{\text{on}}/I_{\text{beyond}}$ |      |
|-------------------------------------|----------------------------------|------|-----------------------------------|------|
|                                     | 638                              | 785  | 638                               | 785  |
| Au plate-PNTP-Au@MBA MLF            | 0.69                             | 0.24 | 1.8                               | 10.2 |
| Au plate-Au@MBA MLF                 |                                  |      | 2.1                               | 10.2 |
| Au plate-PNTP-Au@MBA MLF-Au MLF     | 0.54                             | 0.26 | 1.2                               | 2.3  |
| Au plate-Au@MBA MLF-Au MLF          |                                  |      | 1.1                               | 2.1  |
